# Supplementary material for: A Novel B7-H6–Targeted IgG-Like T Cell–Engaging Antibody for the Treatment of Gastrointestinal Tumors
Source: PubMed Central journal article supplement — Clin Cancer Res. 2022 Sep 27;28(23):5190–201. doi: 10.1158/1078-0432.CCR-22-2108 (PMC9713360; doi:10.1158/1078-0432.ccr-22-2108), 2022-09-27
Supplement: ccr-22-2108_supplementary_figures_s1-s4_suppfs1-fs4.pdf [file ccr-22-2108_supplementary_figures_s1-s4_suppfs1-fs4.pdf]

## Supplementary Information

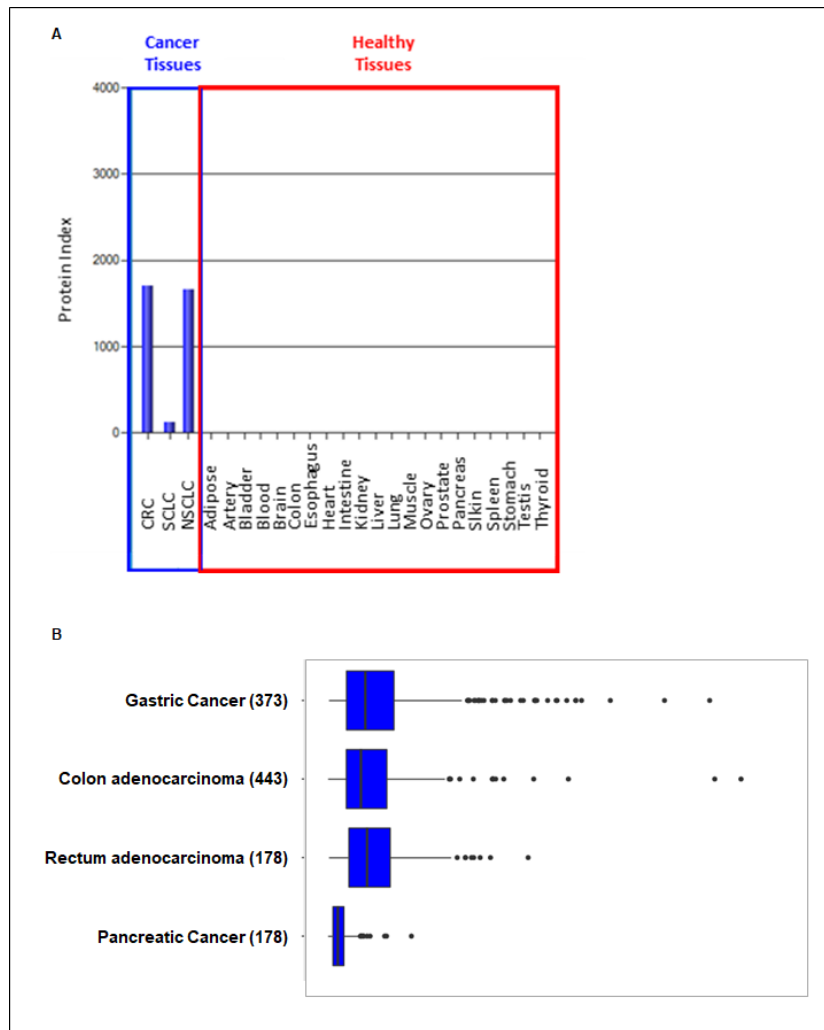

### Supplementary Figure 1

**(A)** OGAP<sup>®</sup> Screen of tumor and non-tumorous (normal, non-diseased tissues).

Plasma membrane fractionations were isolated by tissue homogenization followed by membrane solubilization via ultra-centrifugation and discontinuous sucrose density centrifugation. After trypsinolysis, peptides were fractionated by ion exchange chromatography, before the fractionated samples were analyzed by liquid chromatography-mass spectrometry. Obtained raw data were processed using the Mascot protein identification software (Matrix Science) and compared with the OGAP<sup>®</sup> (Oxford Genome Anatomy Project, Oxford BioTherapeutics, UK) database.

**(B)** B7-H6 mRNA expression in gastrointestinal cancer tissues (TCGA).

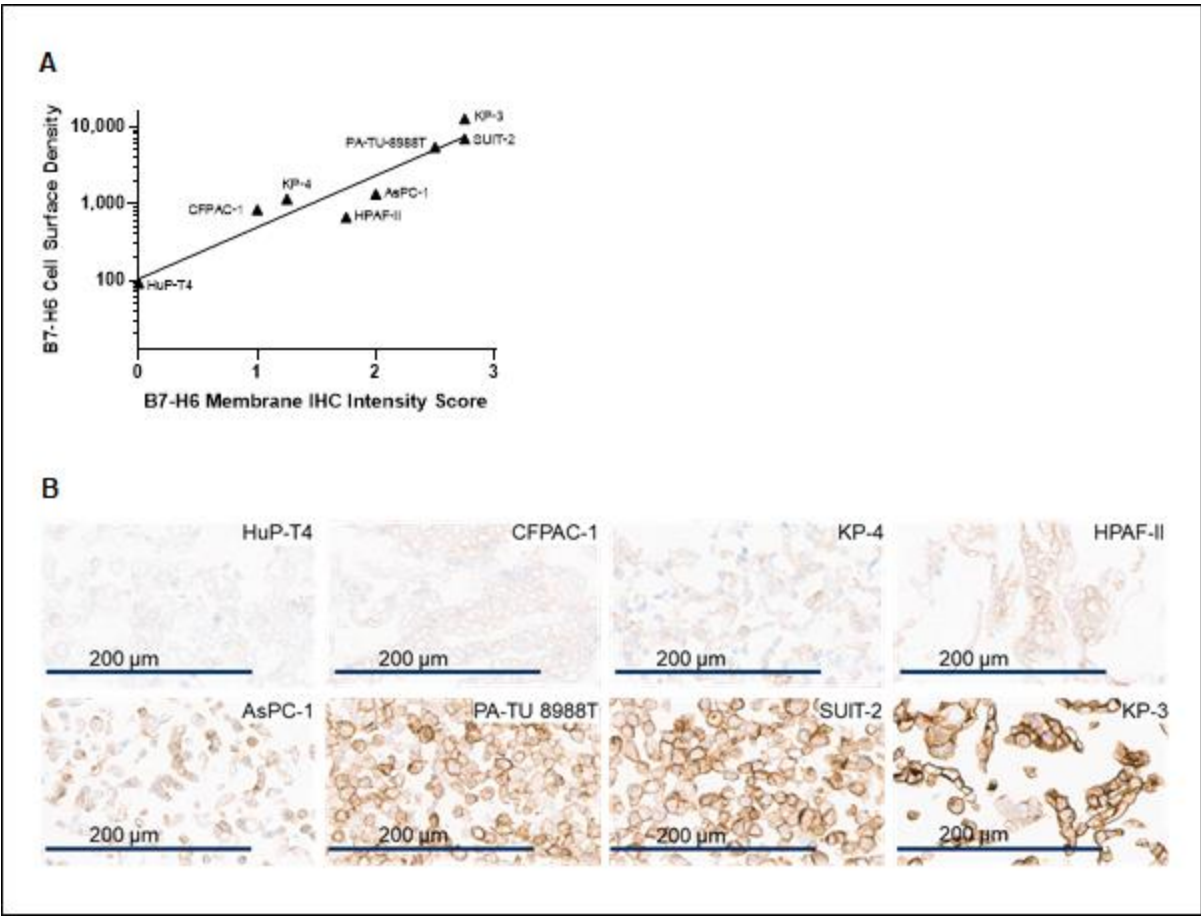

**Supplementary Figure 2**

**B7-H6 expression on cell lines. (A)** Correlation of B7-H6 cell surface density as determined by flow cytometry and membrane IHC intensity score as determined in FFPE cell pellets of eight pancreatic cancer cell lines. **(B)** Representative images of membranous B7-H6 expression in FFPE cell pellets of eight pancreatic cancer cell lines.

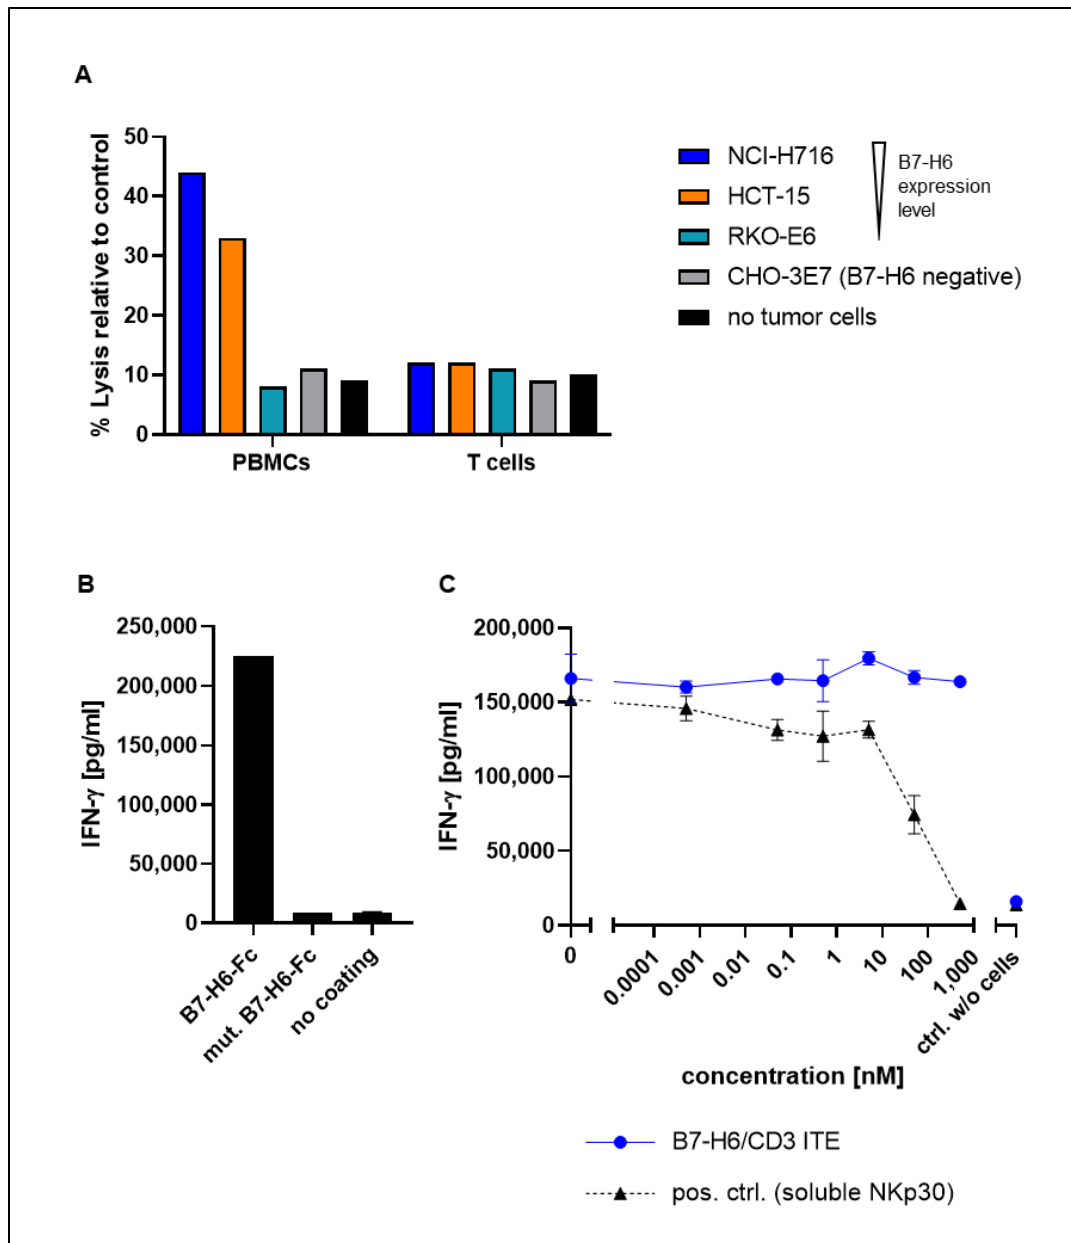

**Supplementary Figure 3**

**Influence of B7-H6/CD3 ITE on the B7-H6-induced activation of NK-92<sup>®</sup> MI cells. (A)** Human PBMCs or T cells and B7-H6-positive NCI-H716 (13,000 B7-H6 on the cell surface), HCT-15 (8,000 B7-H6 on cell surface), RKO-E6 cells (1,700 B7-H6 on the cell surface) or B7-H6-negative CHO-3E7 cells were co-cultivated for 72 hours. Cell lysis was determined by LDH release assay. Bars represent the mean of duplicate measurements. **(B,C)** B7-H6-dependent IFN- $\gamma$  secretion by NK-92<sup>®</sup> MI cells was analyzed after culturing NK-92<sup>®</sup> MI cells 24 hours on cell culture plates coated with recombinant B7-H6 extracellular domain protein. **(B)** IFN- $\gamma$  secretion by NK-92<sup>®</sup> MI cells cultured on plates coated with recombinant B7-H6-Fc or mutated-B7-H6-Fc proteins. **(C)** Influence of BI 765049 on B7-H6-dependent IFN- $\gamma$  secretion of NK-92<sup>®</sup> MI cells. Each datapoint represents the mean of duplicate measurements, error bars represent the SD.

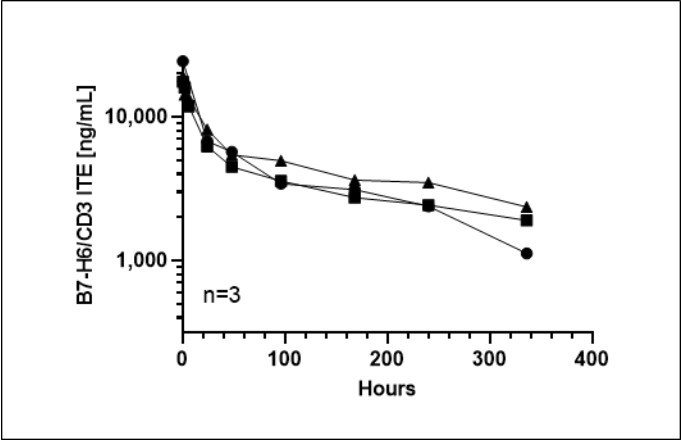

**Supplementary Figure 4**

**Pharmacokinetic profile in NOG mice. Each datapoint represents one animal.**
